# Supplementary material
Source: publisher figshare collection journal article supplement (https://diabetesjournals.figshare.com/ndownloader/files/28917261)
Supplement: Supplementary file 1 [file 28917261]

## Sheet: Sheet1
Table S8. Significantly changed expression (adj. P. value <0.05) of genes recognised as transcription factors in mouse genome analyzed in mmu-miR-30a+c knock down
Gene	Entrez ID	log2 fold change	t	adj.P. value	regulation	Predicted miR30 target
Id1	15901	0.563	8.98	0.0073	upregulated
Cyb5r1	72017	0.428	7.31	0.0136	upregulated
Gtf2f1	98053	0.322	5.86	0.0249	upregulated
Trmt1	212528	0.337	5.84	0.0251	upregulated
Erf	13875	0.322	5.8	0.0255	upregulated
Pax5	18507	0.348	5.62	0.028	upregulated
Gadd45a	13197	0.343	5.39	0.0317	upregulated
Xrcc1	22594	0.262	5.34	0.033	upregulated
Nmi	64685	0.404	5.27	0.0341	upregulated	* (poorly conserved)
Dbp	13170	0.279	5.25	0.0344	upregulated
Tcf3	21423	0.292	4.97	0.0398	upregulated
Irf7	54123	1.33	4.89	0.041	upregulated	* (poorly conserved)
Atf3	11910	0.262	4.83	0.0423	upregulated
Vps72	21427	0.274	4.56	0.0499	upregulated
6720489N17Rik	211378	-0.52	-6.08	0.02235	downregulated
Aco1	11428	-0.303	-5.13	0.03655	downregulated
Aff4	93736	-0.273	-4.56	0.04993	downregulated	* (conserved)
AU041133	216177	-0.352	-4.74	0.04488	downregulated
Bnc2	242509	-0.282	-4.98	0.03959	downregulated	* (conserved)
Ccnt2	72949	-0.449	-7.16	0.01469	downregulated	* (conserved)
Cers6	241447	-0.41	-7.86	0.01131	downregulated
Cux1	13047	-0.267	-5.23	0.03479	downregulated
Dab2	13132	-0.654	-7.41	0.01318	downregulated
Dusp22	105352	-0.463	-6.74	0.01734	downregulated
Elf4	56501	-0.428	-6.7	0.01756	downregulated
Glis3	226075	-0.478	-6.31	0.0202	downregulated
Gm14295	100039123	-0.305	-5.31	0.03341	downregulated
Gm14305	100043387	-0.302	-5.54	0.02911	downregulated
Gm14308	100043381	-0.26	-4.8	0.04292	downregulated
Gm14403	433520	-0.282	-4.87	0.04123	downregulated
Gm15446	100642166	-0.753	-10.4	0.00489	downregulated
Gm20939	100044193	-0.59	-5.82	0.02526	downregulated
Gm3604	100041979	-0.615	-7.83	0.01138	downregulated
Gm4724	100043915	-0.26	-4.8	0.04292	downregulated
Hif1a	15251	-0.798	-9.84	0.00564	downregulated
Hivep2	15273	-0.398	-6.02	0.02308	downregulated
Hmbox1	219150	-0.325	-4.9	0.04096	downregulated
Ikzf5	67143	-0.561	-8.76	0.00775	downregulated
Irf3	54131	-0.425	-7.81	0.01138	downregulated
Kdm7a	338523	-0.769	-11.7	0.00386	downregulated
Klf7	93691	-0.428	-7	0.01557	downregulated
Larp4	207214	-0.314	-4.9	0.04096	downregulated	* (conserved)
Mex3c	240396	-0.492	-6.95	0.01572	downregulated
Mga	29808	-0.596	-7.88	0.01127	downregulated
Mxi1	17859	-0.589	-5.58	0.02851	downregulated
Nf1	18015	-0.334	-5.79	0.02573	downregulated	* (conserved)
Nfat5	54446	-0.723	-13.58	0.00279	downregulated	* (conserved)
Nfatc3	18021	-0.251	-4.6	0.04858	downregulated	* (conserved)
Nono	53610	-0.37	-6.61	0.01814	downregulated
Nr2c1	22025	-0.291	-4.63	0.04774	downregulated
Nr2c2	22026	-0.377	-7.6	0.01215	downregulated
Pbx1	18514	-0.518	-7.76	0.01176	downregulated
Pbx3	18516	-0.568	-7.39	0.01332	downregulated
Peg3	18616	-0.953	-5.61	0.02816	downregulated
Pknox2	208076	-0.456	-6.74	0.01734	downregulated	* (conserved)
Plag1	56711	-0.595	-6.55	0.01845	downregulated
Ppargc1a	19017	-0.323	-6	0.02322	downregulated	* (conserved)
Prkaa2	108079	-1.015	-6.06	0.02256	downregulated	* (conserved)
Purg	75029	-0.393	-5.27	0.03408	downregulated
Rbbp9	26450	-0.363	-6.46	0.01894	downregulated
Rel	19696	-0.377	-4.59	0.04912	downregulated
Socs4	67296	-0.413	-5.09	0.03738	downregulated
Sp2	78912	-0.333	-4.95	0.04015	downregulated
Taf7	24074	-0.596	-6.04	0.02272	downregulated
Tbp	21374	-0.421	-6.47	0.01893	downregulated
Tcf12	21406	-0.588	-6.64	0.01795	downregulated
Tead1	21676	-0.616	-7.32	0.01353	downregulated
Tet1	52463	-0.579	-7.14	0.01477	downregulated	* (conserved)
Tia1	21841	-0.308	-4.63	0.04768	downregulated	* (conserved)
Tmem33	67878	-0.281	-5.15	0.03634	downregulated
Trove2	20822	-0.399	-4.96	0.03999	downregulated
Trps1	83925	-0.7	-11.45	0.00386	downregulated	* (conserved)
Vezf1	22344	-0.285	-4.69	0.04596	downregulated
Zbtb20	56490	-0.331	-4.98	0.0395	downregulated
Zbtb38	245007	-0.274	-4.88	0.04097	downregulated
Zeb1	21417	-0.331	-4.65	0.04718	downregulated
Zfp119a	104349	-0.438	-6.21	0.02098	downregulated
Zfp24	59057	-0.485	-6	0.02322	downregulated
Zfp280d	235469	-0.602	-5.39	0.03172	downregulated
Zfp281	226442	-0.325	-5.01	0.03922	downregulated
Zfp300	245368	-0.487	-5.32	0.03322	downregulated
Zfp384	269800	-0.258	-4.99	0.03928	downregulated
Zfp442	668923	-0.315	-4.67	0.04618	downregulated
Zfp597	71063	-0.372	-4.61	0.04847	downregulated
Zfp654	72020	-0.423	-4.64	0.04749	downregulated
Zfp781	331188	-0.492	-5.03	0.03882	downregulated
Zfp800	627049	-0.317	-5.13	0.03644	downregulated
Zfp846	244721	-0.816	-9.14	0.00715	downregulated
Zfp935	71508	-0.425	-5.79	0.02578	downregulated
Zfp937	245174	-0.292	-4.75	0.04455	downregulated
Zfp97	22759	-0.375	-5.18	0.03571	downregulated
Zfp976	208111	-0.665	-4.79	0.04308	downregulated
Zhx1	22770	-0.451	-6	0.02322	downregulated
Zhx3	320799	-0.348	-4.79	0.04308	downregulated
Zkscan1	74570	-0.359	-5.61	0.02816	downregulated
